# Supplementary material
Source: Research Square preprint supplement (doi:10.21203/rs.3.rs-10411144/v1)
Supplement: Supplementary file 1 [file 1175d6758bd404f950a3ada0.docx]

# **TITLE PAGE**

**Clinical, microbiological and antimicrobial resistance profile of complicated urinary tract infections managed in a Hospital-at-Home programme: a prospective observational cohort study**

**Authors:** Lira Pelari Mici¹, Elena Arranz Canales², Alexia Constanza Espiño Álvarez², Eva María Fernández Bermejo², Ángela Sánchez Juez², Victoria Gutiérrez Gómez-Lus², Fernando Ruiz Berraco², Saida Alonso Marrero², Jaime Bustos Carpio², José Curbelo³, Eduardo Albers Acosta⁴, Pablo Rodríguez Cortés².

**Affiliations:**

1. Department of Urology, Hospital Universitario de La Princesa, Madrid, Spain.

2. Hospital-at-Home Unit, Hospital Universitario de La Princesa, Madrid, Spain.

3. Faculty of Medicine, Universidad Francisco de Vitoria, Madrid, Spain.

4. Department of Urology, University Hospital Basel, Basel, Switzerland.

**Acknowledgments:** None.

**ORCIDs:**

Lira Pelari Mici: 0000-0002-8954-5351

Elena Arranz Canales: 0009-0002-9404-6415

Alexia Constanza Espiño Álvarez: 0000-0001-5343-9541

Eva María Fernández Bermejo: 0009-0007-0693-9667

Ángela Sánchez Juez: 0009-0007-0203-2355

Victoria Gutiérrez Gómez-Lus: 0009-0007-3326-4896

Fernando Ruiz Berraco: 0009-0008-1652-4622

Saida Alonso Marrero: 0009-0003-5212-6940

Jaime Bustos Carpio: 0009-0009-3734-3393

José Curbelo: 0000-0002-0809-9944

Eduardo Albers Acosta: 0000-0002-0091-6209

Pablo Rodríguez Cortés: 0000-0003-1321-0616

**Corresponding author:** Lira Pelari Mici, lira.pelari@gmail.com, C/ Diego de León 62, 28006 Madrid, Spain

# **Online Resource 1. Inclusion and exclusion criteria for HaH admission**

**Inclusion criteria:**

• Confirmed diagnosis - or at least a syndromic approach - must be established.

• Hospital-level care must be required because of the complexity or intensity of the patient’s needs.

• The patient must be clinically and haemodynamically stable, with comorbidities that can be managed at home.

• For inclusion in an antimicrobial programme (OPAT), there must be diagnostic certainty of an infectious process defined by clinical and laboratory criteria (with or without microbiological documentation) that requires intravenous therapy after alternative routes, including oral therapy, have been ruled out as inadequate or inappropriate.

• A primary caregiver capable of caring for the patient during the HaH admission must be available. Admission without a caregiver may be considered in young and fully autonomous patients.

• The patient and the primary caregiver must agree to HaH admission and provide verbal consent. HaH may be declined at any time, in which case the patient can be admitted to a conventional ward. The patient also retains the right to request voluntary discharge.

• Telephone communication must be available and the home must offer hygienic conditions compatible with safe and aseptic practice.

• The patient must reside within the catchment area of the reference hospital.

**Exclusion criteria:**

• Failure to meet any of the inclusion criteria.

• Complexity of care exceeding the capacity of the HaH unit.

• Cognitive or physical impairment of the patient in the absence of a caregiver able to assume care.

• Poor treatment adherence or non-compliance with the HaH team’s rules and recommendations.

• Lack of electricity or running water.

• Unsafe environment for healthcare professionals.

• Uncontrolled acute psychiatric disease (suicidal ideation, acute psychosis) or substance use compromising safe healthcare delivery (intravenous drug use).

• Absence of a post-discharge plan from the referring service.
