# Supplementary material
Source: Research Square preprint supplement (doi:10.21203/rs.3.rs-10411144/v1)
Supplement: Supplementary file 2 [file 2d403b43de865e3ff3c0abca.docx]

# **TITLE PAGE**

**Clinical, microbiological and antimicrobial resistance profile of complicated urinary tract infections managed in a Hospital-at-Home programme: a prospective observational cohort study**

**Authors:** Lira Pelari Mici¹, Elena Arranz Canales², Alexia Constanza Espiño Álvarez², Eva María Fernández Bermejo², Ángela Sánchez Juez², Victoria Gutiérrez Gómez-Lus², Fernando Ruiz Berraco², Saida Alonso Marrero², Jaime Bustos Carpio², José Curbelo³, Eduardo Albers Acosta⁴, Pablo Rodríguez Cortés².

**Affiliations:**

1. Department of Urology, Hospital Universitario de La Princesa, Madrid, Spain.

2. Hospital-at-Home Unit, Hospital Universitario de La Princesa, Madrid, Spain.

3. Faculty of Medicine, Universidad Francisco de Vitoria, Madrid, Spain.

4. Department of Urology, University Hospital Basel, Basel, Switzerland.

**Acknowledgments:** None.

**ORCIDs:**

Lira Pelari Mici: 0000-0002-8954-5351

Elena Arranz Canales: 0009-0002-9404-6415

Alexia Constanza Espiño Álvarez: 0000-0001-5343-9541

Eva María Fernández Bermejo: 0009-0007-0693-9667

Ángela Sánchez Juez: 0009-0007-0203-2355

Victoria Gutiérrez Gómez-Lus: 0009-0007-3326-4896

Fernando Ruiz Berraco: 0009-0008-1652-4622

Saida Alonso Marrero: 0009-0003-5212-6940

Jaime Bustos Carpio: 0009-0009-3734-3393

José Curbelo: 0000-0002-0809-9944

Eduardo Albers Acosta: 0000-0002-0091-6209

Pablo Rodríguez Cortés: 0000-0003-1321-0616

**Corresponding author:** Lira Pelari Mici, lira.pelari@gmail.com, C/ Diego de León 62, 28006 Madrid, Spain

# **Online Resource 2. Description of the Hospital-at-Home care model**

The HaH Unit at Hospital Universitario de La Princesa was established in March 2023. The unit operates a single daily home-visit route, allowing a maximum concurrent capacity of eight patients.

**Staffing and coverage:**

The unit is staffed by two internal medicine physicians, three nurses, and one nursing assistant. Because the team jointly manages a maximum of eight concurrent patients, individual patient-to-staff ratios are not formally assigned. On weekdays, in-person physician and nursing attendance is provided from 8:00 to 15:00, followed by physician telephone on-call coverage from 15:00 to 22:00. On weekends and public holidays, in-person nursing attendance runs from 8:00 to 15:00, physician telephone on-call coverage from 9:00 to 21:00. Outside these hours, urgent clinical needs are managed through the usual hospital and community emergency services.

**Visit frequency:**

All patients receive a daily morning nursing visit (Monday to Sunday) and a daily physician visit on weekdays (Monday to Friday); on weekends, physician follow-up is conducted by telephone, with in-person nursing visits maintained daily. Visit frequency may be increased according to individual clinical needs, but it is not routinely modified according to a predefined phase of the care episode.

**Clinical assessments and procedures performed at home:**

Home-based care may include vital-sign monitoring; medical and nursing clinical assessment, including the use of standardised nursing scales; assessment of lifestyle factors and provision of dietary and health counselling; review of vaccination status before discharge; blood sampling and collection of specimens for microbiological testing; point-of-care ultrasonography; electrocardiography; video consultation when required; intravenous iron administration; and complex wound care.

**Admission volume and case-mix:**

From its establishment in March 2023 to the end of the study period in March 2026, the unit managed approximately 810 HaH episodes, corresponding to an average annual volume of approximately 270 episodes. As the unit was established at the beginning of the study period, no previous admission volume was available for comparison.

The case mix was predominantly composed of infectious diseases, which accounted for more than 80% of episodes. The most frequent conditions included urinary tract infections, respiratory tract infections, skin and soft-tissue infections, and bloodstream or endovascular infections. Exacerbations of chronic obstructive pulmonary disease were also frequently managed. Decompensated heart failure accounted for approximately 8% of episodes, while the remaining episodes comprised a heterogeneous group of other acute conditions and exacerbations of chronic diseases.
