# Supplementary material
Source: Research Square preprint supplement (doi:10.21203/rs.3.rs-10411144/v1)
Supplement: Supplementary file 3 [file 76daea38cac1bf556be459c8.docx]

# **Online Resource 3. STROBE Statement - Checklist for cohort studies**

*Manuscript: "Clinical, microbiological and antimicrobial resistance profile of complicated urinary tract infections managed in a Hospital-at-Home programme: a prospective observational cohort study"*

**Title:**

Clinical, microbiological and antimicrobial resistance profile of complicated urinary tract infections managed in a Hospital-at-Home programme: a prospective observational cohort study

**Authors:**

Lira Pelari Mici¹, Elena Arranz Canales², Alexia Constanza Espiño Álvarez², Eva María Fernández Bermejo², Ángela Sánchez Juez², Victoria Gutiérrez Gómez-Lus², Fernando Ruiz Berraco², Saida Alonso Marrero², Jaime Bustos Carpio², José Curbelo³, Eduardo Albers Acosta⁴, Pablo Rodríguez Cortés².

**Affiliations:**

1. Department of Urology, Hospital Universitario de La Princesa, Madrid, Spain.

2. Hospital-at-Home Unit, Hospital Universitario de La Princesa, Madrid, Spain.

3. Faculty of Medicine, Universidad Francisco de Vitoria, Madrid, Spain.

4. Department of Urology, University Hospital Basel, Basel, Switzerland.

**Corresponding author:**

Lira Pelari Mici, lira.pelari@gmail.com, C/ Diego de León 62, 28006 Madrid, Spain

| **Item No** | **Recommendation** | **STROBE checklist (cohort)** | **Reported in manuscript (section)** |
| --- | --- | --- | --- |
| 1 | Title and abstract | (a) Indicate the study's design with a commonly used term in the title or the abstract  (b) Provide in the abstract an informative and balanced summary of what was done and what was found | Abstract - Methods ("Prospective observational single-centre cohort")  Abstract (Purpose / Methods / Results / Conclusion) |
| 2 | Background / rationale | Explain the scientific background and rationale for the investigation being reported | Introduction |
| 3 | Objectives | State specific objectives, including any prespecified hypotheses | Introduction, final paragraph (primary and secondary, exploratory objectives) |
| 4 | Study design | Present key elements of study design early in the paper | Methods, Study design and population |
| 5 | Setting | Describe the setting, locations and relevant dates, including periods of recruitment, exposure, follow-up, and data collection | Methods, Study design and population (HaH Unit of a tertiary teaching hospital in Madrid, Spain; March 2023-October 2025) |
| 6 | Participants | (a) Cohort study - Give the eligibility criteria, and the sources and methods of selection of participants. Describe methods of follow-up  (b) Cohort study - For matched studies, give matching criteria and number of exposed and unexposed | Methods, Study design and population (all consecutive cUTI episodes; admission-avoidance and early-discharge pathways) + Online Resource 1 (inclusion and exclusion criteria); 30-day follow-up described in Methods, Variables  Not applicable (single descriptive cohort; no matching) |
| 7 | Variables | Clearly define all outcomes, exposures, predictors, potential confounders, and effect modifiers. Give diagnostic criteria, if applicable | Methods, Definitions; Methods, Variables |
| 8 | Data sources / measurement | For each variable of interest, give sources of data and details of methods of assessment (measurement). Describe comparability of assessment methods if there is more than one group | Methods, Variables (purpose-built structured prospective database with periodic quality-control checks); Methods, Definitions (EAU 2024 Guidelines; Sepsis-3 criteria; predefined clinical-cure definition) |
| 9 | Bias | Describe any efforts to address potential sources of bias | Methods, Study design and population (consecutive inclusion of all eligible episodes); Methods, Variables (prospective standardised data collection); Discussion, Limitations |
| 10 | Study size | Explain how the study size was arrived at | Methods, Study design and population (all consecutive cUTI episodes during the inclusion period; n = 262); Discussion, Limitations (low events-per-variable ratio acknowledged) |
| 11 | Quantitative variables | Explain how quantitative variables were handled in the analyses. If applicable, describe which groupings were chosen and why | Methods, Statistical analysis (continuous variables summarised as median/IQR; categorical as n/%). Age also categorised at >65 and >80 years for descriptive purposes (Table 1) |
| 12 | Statistical methods | (a) Describe all statistical methods, including those used to control for confounding  (b) Describe any methods used to examine subgroups and interactions  (c) Explain how missing data were addressed  (d) Cohort study - If applicable, explain how loss to follow-up was addressed  (e) Describe any sensitivity analyses | Methods, Statistical analysis (Mann-Whitney U test; chi-squared with Yates correction or Fisher's exact test; exploratory multivariable logistic regression with candidate variables selected by clinical relevance and bivariate association, avoiding inclusion of highly collinear geriatric markers)  Not applicable (no formal subgroup or interaction analyses planned)  Methods, Statistical analysis: "No missing values were recorded for the variables included in the analyses, owing to the prospective and structured data-collection process." No imputation procedures were required. Stated also in footnotes of Tables 1 and 2  Methods, Variables: 30-day follow-up ascertained from the integrated electronic health record of the catchment area; patients with no recorded healthcare contact were classified as event-free; loss to follow-up considered negligible  Not performed in this descriptive cohort |
| 13 | Participants | (a) Report numbers of individuals at each stage of study  (b) Give reasons for non-participation at each stage  (c) Consider use of a flow diagram | Results, Baseline characteristics of the cohort: "All 262 consecutive cUTI episodes managed in the HaH Unit during the study period met the eligibility criteria and were included in the analysis; no patients were lost to 30-day follow-up (Fig. 1)"  Not applicable - consecutive inclusion of all eligible episodes; no non-participation  Fig. 1 - Patient flow diagram (262 consecutive episodes; complete 30-day follow-up; components of the composite endpoint) |
| 14 | Descriptive data | (a) Give characteristics of study participants and information on exposures and potential confounders  (b) Indicate number of participants with missing data for each variable of interest  (c) Cohort study - Summarise follow-up time | Results, Baseline characteristics of the cohort + Table 1; Results, Urological and microbiological characteristics + Table 2  No missing data for any variable; explicitly stated in footnotes of Tables 1 and 2 and applicable to Tables 3 and 4 given the prospective structured data collection  Results, Antimicrobial therapy and management in Hospital-at-Home (median HaH stay 4 days, IQR 3); 30-day post-discharge follow-up window stated in Methods, Variables |
| 15 | Outcome data | Cohort study - Report numbers of outcome events or summary measures over time | Results, Clinical outcomes during the HaH episode + 30-day outcomes + Table 3 (clinical cure, in-HaH unplanned transfer, in-HaH deaths, 30-day readmission, 30-day death, composite endpoint) |
| 16 | Main results | (a) Give unadjusted estimates and, if applicable, confounder-adjusted estimates and their precision (e.g., 95% CI)  (b) Report category boundaries when continuous variables were categorised  (c) If relevant, consider translating estimates of relative risk into absolute risk for a meaningful time period | Results, Factors associated with the 30-day composite endpoint + Table 4 (bivariate analysis); exploratory multivariable logistic regression with OR and 95% CI for older age and prior urological manipulation, with rationale for variable selection described in Methods, Statistical analysis  Age categorised at >65 and >80 years (Table 1)  Not applicable (descriptive cohort) |
| 17 | Other analyses | Report other analyses done | None performed |
| 18 | Key results | Summarise key results with reference to study objectives | Discussion, Main findings |
| 19 | Limitations | Discuss limitations of the study, taking into account sources of potential bias or imprecision | Discussion, Limitations (single-centre design, absence of a concurrent conventional-hospitalisation comparator, heterogeneous composite endpoint, low events-per-variable ratio, 30-day follow-up window, outcomes not captured) |
| 20 | Interpretation | Give a cautious overall interpretation of results considering objectives, limitations, multiplicity of analyses, results from similar studies, and other relevant evidence | Discussion, Comparison with previous literature; Discussion, Antimicrobial stewardship considerations; Discussion, Exploratory factors associated with the composite endpoint; Discussion, Clinical implications |
| 21 | Generalisability | Discuss the generalisability (external validity) of the study results | Discussion, Limitations (single urban tertiary centre with defined catchment area) |
| 22 | Funding | Give the source of funding and the role of the funders | Statements and Declarations - Funding (no specific grant from any funding agency) |

*All STROBE items have been addressed in the final manuscript. An editable Online Resource 1 (inclusion and exclusion criteria for HaH admission) and Online Resource 2 (description of the HaH Unit) accompany this checklist. The completed STROBE checklist is provided in accordance with the EQUATOR Network recommendations for reporting of observational cohort studies.*
